# Supplementary material for: Does the posterior surface of the femoral head maintain its sphericity in patients with end-stage osteoarthritis?
Source: Research Square preprint supplement (doi:10.21203/rs.3.rs-7411636/v1), 2025-09-15
Supplement: Supplementary file 1 [file a009bdc37c856c3678889c6c.docx]

**Manuscript title**

Does the posterior surface of the femoral head maintain its sphericity in patients with end-stage osteoarthritis?

**Authors**

Christopher TJ Madden-McKee1, Owen J Diamond1, Janet C Hill1, Aaron J McCann2, Cormac McGrath2, David E Beverland1

**Affiliations**

1Primary Joint Unit, Musgrave Park Hospital, Belfast Health and Social Care Trust, Belfast, UK

2Regional Medical Physics Service, Belfast Health and Social Care Trust, Belfast, UK

**Corresponding author**

Janet C Hill

Primary Joint Unit, Musgrave Park Hospital, Belfast Health and Social Care Trust, Stockmans Lane, Belfast, BT9 7JB, UK

Phone: 02895046799

Email: Janet.Hill@belfasttrust.hscni.net

**Online Resource 1.** This document contains code used in MATLAB programme for calculating the percentage of cartilage loss on three-dimensional models of femoral heads from two-dimensional photographs after the area of cartilage loss and the circular outline of the intact femoral head were manually marked.

function [outputheader, output] = femoral_cartilage_segmentation_singlemeasure(filename)

close all

if nargin == 0;

if exist('d:\', 'dir') == 7;

cd ('D:\');

else

cd ('C:\');

end

[fn, pn] = uigetfile('*.*');

filename = [pn fn];

end

original_image = imread(filename);

resized_image = imresize(original_image, 0.25);

[cropresized, coords] = imcrop(resized_image);

coords = round(coords);

cropped_image = original_image(4.0*coords(2):4.0*(coords(2)+coords(4)), 4.0*coords(1):4.0*(coords(1)+coords(3)),:);

h_im = imshow(cropped_image);

xsize = coords(3)*4.0+1;

ysize = coords(4)*4.0+1;

%figure(1);

%set(1, 'Name', 'Click on region of femoral head');

%imshow(resized_image);

%[x, y] = ginput(1);

%cropped_image = original_image(4.0*y-200:4.0*y+199, 4.0*x-200:4.0*x+199, :);

%h_im = imshow(cropped_image);

qbutton1 = menu('Select viewpoint', 'Superior', 'Inferior', 'Anterior', ...

'Posterior');

if (qbutton1(1) == 1);

outputheader = {'Superior'};

end

if (qbutton1(1) == 2);

outputheader = {'Inferior'};

end

if (qbutton1(1) == 3);

outputheader = {'Anterior'};

end

if (qbutton1(1) == 4);

outputheader = {'Posterior'};

end

figure(1);

set(1, 'Name', 'Left-click on or near all valid femoral head edges. Right-click to finish');

button = 1;

allx = [];

ally = [];

hold on

% Get click-points on/near valid regions of the femoral head boundary

while button == 1;

[xx, yy, button] = ginput(1);

if button == 1;

allx = [allx, xx];

ally = [ally, yy];

plot(xx, yy, 'o');

end

end

hold off

% fit circle to clicked points

allx = allx(:);

ally = ally(:);

circ_coeffs = [allx ally ones(size(allx))]\[-(allx.^2+ally.^2)];

xcentre = -.5*circ_coeffs(1);

ycentre = -.5*circ_coeffs(2);

radcircle = sqrt((circ_coeffs(1)^2+circ_coeffs(2)^2)/4-circ_coeffs(3));

% overlay circle on image

angles = [0:360]*(pi)/180;

xdisp = xcentre + radcircle*cos(angles);

ydisp = ycentre + radcircle*sin(angles);

line (xdisp, ydisp, 'color', 'g', 'LineWidth', 2);

button=1;

BWpolytot = false(ysize,xsize);

while button ==1;

if button == 1;

set(1, 'Name', 'Define ROI containing intact cartilage');

roi = impoly('Closed', 1);

BWpoly = createMask(roi, h_im);

BWpolytot = BWpolytot | BWpoly;

end

set(1, 'Name', 'Left-click to draw more ROIs. Right-click to finish');

[xx,yy,button] = ginput(1);

end

%get relative surface area of sphere projected at each point

surfarea_cartilage = zeros(ysize,xsize);

surfarea_nocartilage = zeros(ysize,xsize);

for yy=1:ysize;

for xx=1:xsize;

xyrad = sqrt((xx-xcentre)^2 + (yy-ycentre)^2);

if xyrad < (0.95*radcircle);

radfrac = xyrad/radcircle;

radstep = 1.0/(2.0*radcircle);

if BWpolytot(yy,xx)==1;

surfarea_cartilage(yy,xx) = asin(radfrac+radstep) - asin(radfrac-radstep);

else

surfarea_nocartilage(yy,xx) = asin(radfrac+radstep) - asin(radfrac-radstep);

end

end

end

end

figure(2)

set(2, 'Name', 'Regions with intact cartilage');

imshow(surfarea_cartilage*30);

line (xdisp, ydisp, 'color', 'g', 'LineWidth', 2);

figure(3)

set(2, 'Name', 'Regions without intact cartilage');

imshow(surfarea_nocartilage*30);

line (xdisp, ydisp, 'color', 'g', 'LineWidth', 2);

%latitude

%figure(1)

hold on

ymax = ycentre+radcircle;

ymin = ycentre-radcircle;

ylines = [0:5] * (ymax-ymin)/5 + ymin;

longtd_x = zeros(6,5);

longtd_temp = [1-cosd(10.),1-cosd(46.),1-cosd(82.),1+cosd(62.),1+cosd(26)];

for linenum=1:6

xmin = xcentre - sqrt(radcircle^2 - (ylines(linenum)-ycentre)^2);

xmax = xcentre + sqrt(radcircle^2 - (ylines(linenum)-ycentre)^2);

figure(2);

hold on

line([xmin,xmax],[ylines(linenum),ylines(linenum)],'color','b','LineWidth',1);

figure(3);

hold on

line([xmin,xmax],[ylines(linenum),ylines(linenum)],'color','b','LineWidth',1);

longtd_x(linenum,:) = xmin + (xmax-xmin)*longtd_temp/2.0;

end

longtd_x = fix(longtd_x);

% longitude

for longnum=1:5

fitcoeffs = polyfit(ylines', longtd_x(:,longnum),4);

yindices = [fix(min(ylines)):fix(max(ylines))];

xindices = fitcoeffs(1)*(yindices.*yindices.*yindices.*yindices) + fitcoeffs(2)*(yindices.*yindices.*yindices) + fitcoeffs(3)*(yindices.*yindices)+fitcoeffs(4)*yindices+fitcoeffs(5);

figure(2);

hold on

line(xindices,yindices, 'color','b');

figure(3);

hold on

line(xindices,yindices, 'color','b');

end

% Output percent coverage of intact hemisphere

all_frac = (sum(sum(surfarea_cartilage)))/(sum(sum(surfarea_cartilage)) + sum(sum(surfarea_nocartilage)));

outputheader

%output = [left_top_frac, left_bottom_frac, right_top_frac, right_bottom_frac, left_frac, right_frac, top_frac, bottom_frac, all_frac]'

output = [all_frac]'

hh=0;
